# Supplementary material for: The Impact of Surface Water Seepage on Seismicity and Rockbursting in Mines
Source: MDPI journal article supplement (doi:10.3390/su142215414), 2022-11-20

Supplementary data to the article “The Impact of Surface Water Seepage on Seismicity and Rockbursting in Mines”

Anatoly Kozyrev, Andrian Batugin, JianpingZuo and Svetlana Zhukova

Figure S1. View of the Apatitovy Tsirk and the Rasvumchorr Plateau deposits

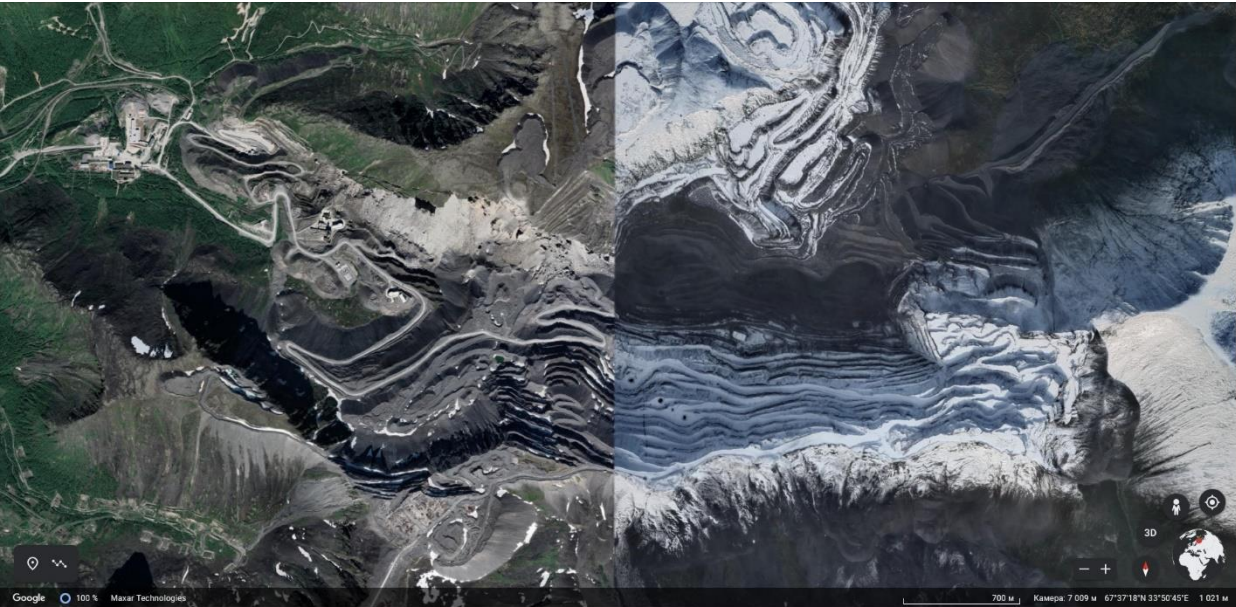

Figure S2. Map of seismic events location (2012-2018)

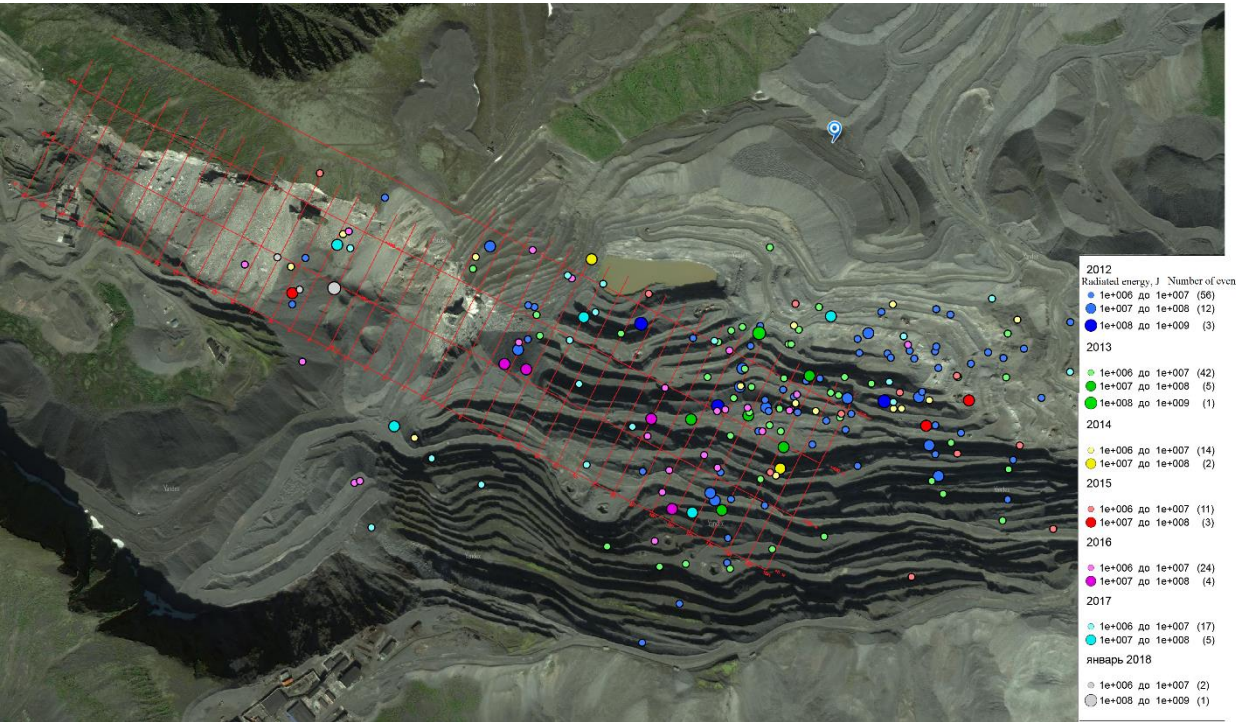



Figure S3. Water seepage in mine

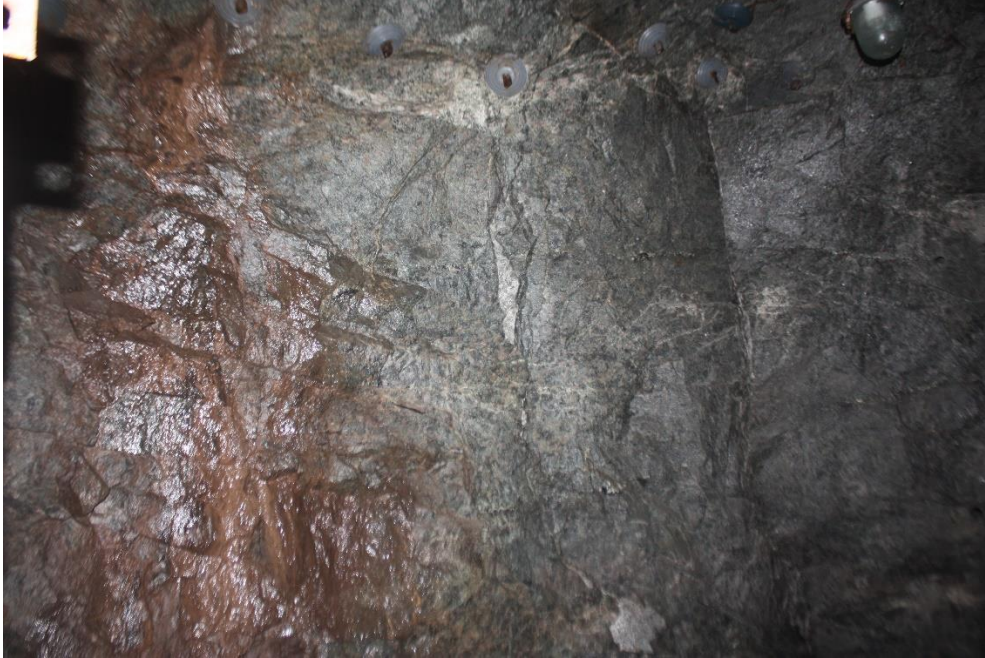

Figure S4. The damage after rockburst

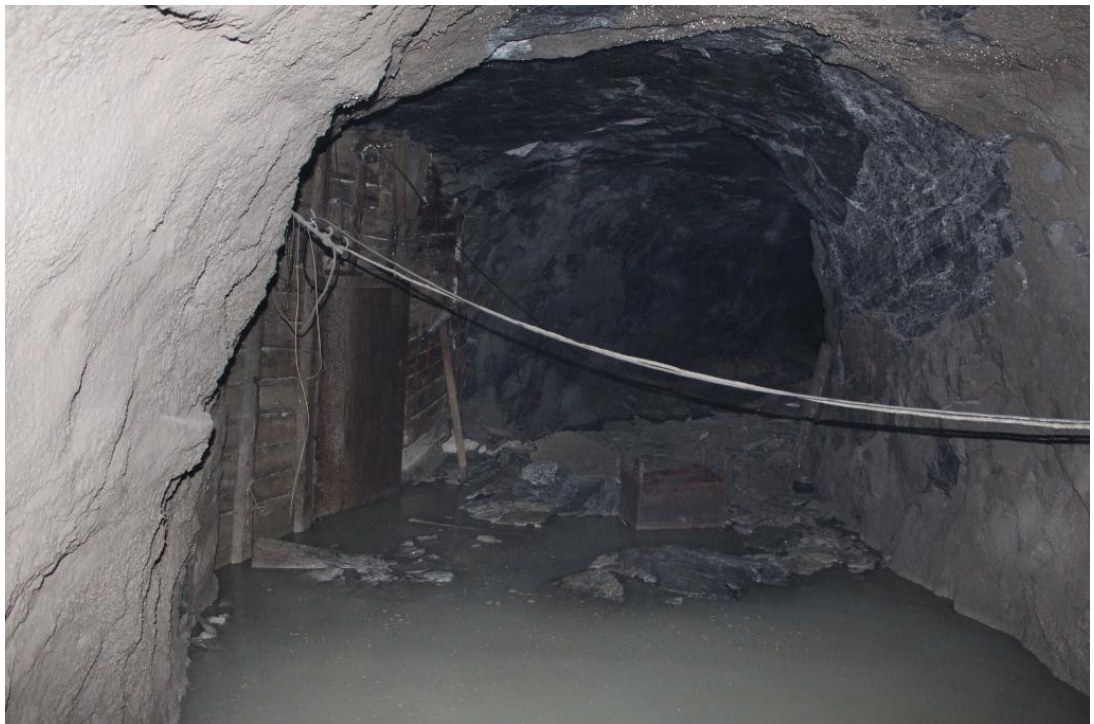

Supplement: s1 [file s1]
